# Supplementary material for: Downregulation of miR-141-3p promotes bone metastasis via activating NF-κB signaling in prostate cancer
Source: Springer Nature journal article supplement (doi:10.1186/s13046-017-0645-7), 2017-12-01
Supplement: MOESM1 [file 15277458]

**Table S1. A list of primers used in the reactions for clone PCR.**

| <b>Used for subcloning and plasmid construction:</b> |                           |
|------------------------------------------------------|---------------------------|
| miR-141-3p-clone-Forward                             | TCCCACCCAGTGCGATTTGTC     |
| miR-141-3p-clone-Reverse                             | GTTGCTGGGAGGCTAAGATGAG    |
| TRAF5-3UTR-clone-Forward                             | ACTGTGGAGGAGAGCACATTTG    |
| TRAF5-3UTR-clone-Reverse                             | CTTGCAAACACTGTGCTTGCAAAC  |
| TRAF6-3UTR-clone-Forward                             | AGTGCCTTTCCTTGCCCTGTTC    |
| TRAF6-3UTR-clone-Reverse                             | GGGGAAGATGCTACTTCGTAACCTC |
