# Supplementary material for: Downregulation of miR-141-3p promotes bone metastasis via activating NF-κB signaling in prostate cancer
Source: Springer Nature journal article supplement (doi:10.1186/s13046-017-0645-7), 2017-12-01
Supplement: MOESM2 [file 15277458]

**Table S2. A list of primers used in the reactions for real-time RT-PCR.**

| <b>Real-time PCR primer:</b> |                        |
|------------------------------|------------------------|
| TRAF1-forward                | CTTCCCTTGAAGGAGCAGC    |
| TRAF1-reverse                | CTATAAGCCCAGGAAGCCG    |
| TRAF5-forward                | GGATGAAACCACAGGGCATA   |
| TRAF5-reverse                | GCAGCCAGGAGCAGCAG      |
| TRAF6-forward                | GCCACACAGCAGTCACTTTC   |
| TRAF6-reverse                | TCCCCGCGCACTAGAAC      |
| IL11-forward                 | TGAAGACTCGGCTGTGACC    |
| IL11- reverse                | CCTCACGGAAGGACTGTCTC   |
| TWIST1-forward               | TCCATTTTCTCCTTCTCTGGAA |
| TWIST1-reverse               | GTCCGCGTCCCCTAGC       |
| MMP13-forward                | AACATCCAAAAACGCCAGAC   |
| MMP13-reverse                | GGAAGTTCTGGCCAAAATGA   |
| Vimentin-forward             | ATTCCACTTTGCGTTCAAGG   |
| Vimentin-reverse             | CTTCAGAGAGAGGAAGCCGA   |
| SNAIL2-forward               | TGACCTGTCTGCAAATGCTC   |
| SNAIL2-reverse               | CAGACCCTGGTTGCTTCAA    |
| GAPDH-forward                | ATTCCACCCATGGCAAATTC   |
| GAPDH-reverse                | TGGGATTTCCATTGATGACAAG |
