# Supplementary material for: Downregulation of miR-141-3p promotes bone metastasis via activating NF-κB signaling in prostate cancer
Source: Springer Nature journal article supplement (doi:10.1186/s13046-017-0645-7), 2017-12-01
Supplement: MOESM3 [file 15277458]

**Table S3. The clinicopathological characteristics in 141 patients with prostate cancer**

| Parameters                               | Number of cases |
|------------------------------------------|-----------------|
| Age (years)                              |                 |
| $\leq 75$                                | 76              |
| $> 75$                                   | 65              |
| Differentiation                          |                 |
| Well/moderate                            | 62              |
| Poor                                     | 79              |
| Serum PSA at diagnosis, $\mu\text{g/mL}$ |                 |
| $< 18.9$                                 | 71              |
| $> 18.9$                                 | 70              |
| Gleason grade                            |                 |
| $\leq 7$                                 | 77              |
| $> 7$                                    | 64              |
| Operation                                |                 |
| TURP                                     | 57              |
| Needle biopsy                            | 65              |
| TURP+PP                                  | 3               |
| TURP+BO                                  | 10              |
| BO                                       | 6               |
| miR-141-3p expression                    |                 |
| $< 4.13$                                 | 71              |
| $> 4.13$                                 | 70              |
| BM-status                                |                 |
| BM-free                                  | 89              |
| BM                                       | 52              |

**Abbreviation: PSA, prostate-specific antigen; TURP, Trans Urethral Resection Prostate;**

**PP, Prior Prostatectomy; BO, Bilateral Orchiectomies; SD, Standard deviation; IHC,**

**Immunological Histological Chemistry; BM, Bone Metastasis.**
