# Supplementary material for: Downregulation of miR-141-3p promotes bone metastasis via activating NF-κB signaling in prostate cancer
Source: Springer Nature journal article supplement (doi:10.1186/s13046-017-0645-7), 2017-12-01
Supplement: MOESM4 [file 15277458]

**Table S4. The relationship between miR-141-3p and clinicopathological characteristics in 141 patients with prostate cancer.**

| Parameters             | Number of cases | miR-141-3p expression |      | <i>P</i> values |
|------------------------|-----------------|-----------------------|------|-----------------|
|                        |                 | Low                   | High |                 |
| <b>Age (years)</b>     |                 |                       |      |                 |
| ≤75                    | 76              | 33                    | 43   | 0.075           |
| >75                    | 65              | 38                    | 27   |                 |
| <b>Differentiation</b> |                 |                       |      |                 |
| Well/moderate          | 62              | 36                    | 26   | 0.105           |
| Poor                   | 79              | 35                    | 44   |                 |
| <b>Serum PSA</b>       |                 |                       |      |                 |
| <18.9                  | 71              | 25                    | 46   | <0.001*         |
| >18.9                  | 70              | 46                    | 24   |                 |
| <b>Gleason grade</b>   |                 |                       |      |                 |
| ≤7                     | 77              | 23                    | 54   | <0.001*         |
| >7                     | 64              | 48                    | 16   |                 |
| <b>Operation</b>       |                 |                       |      |                 |
| TURP                   | 57              | 30                    | 27   | 0.109           |
| Needle biopsy          | 65              | 34                    | 31   |                 |
| TURP+PP                | 3               | 3                     | 0    |                 |
| TURP+BO                | 10              | 2                     | 8    |                 |
| BO                     | 6               | 2                     | 4    |                 |
| <b>BM-status</b>       |                 |                       |      |                 |
| nBM                    | 89              | 35                    | 54   | <0.001*         |
| BM                     | 52              | 36                    | 16   |                 |
