# Supplementary material for: Downregulation of miR-141-3p promotes bone metastasis via activating NF-κB signaling in prostate cancer
Source: Springer Nature journal article supplement (doi:10.1186/s13046-017-0645-7), 2017-12-01

## Supplemental Figure 2

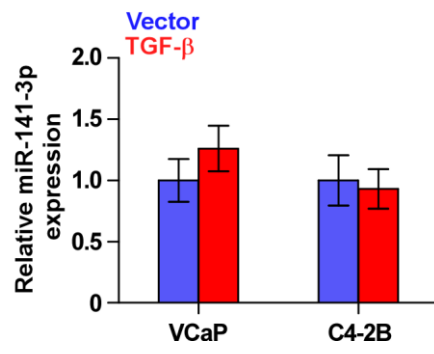

Supplement: MOESM6 [file 15277458]
